# Supplementary material for: Do the Rich Always Become Richer? Characterizing the Leaf Physiological Response of the High-Yielding Rice Cultivar Takanari to Free-Air CO2 Enrichment
Source: PubMed Central journal article supplement (PMC3913450; doi:10.1093/pcp/pcu009), 2014-01-30
Supplement: supp_pcu009_pcp-2013-e-00573-File007.pdf [file supp_pcu009_pcp-2013-e-00573-File007.pdf]

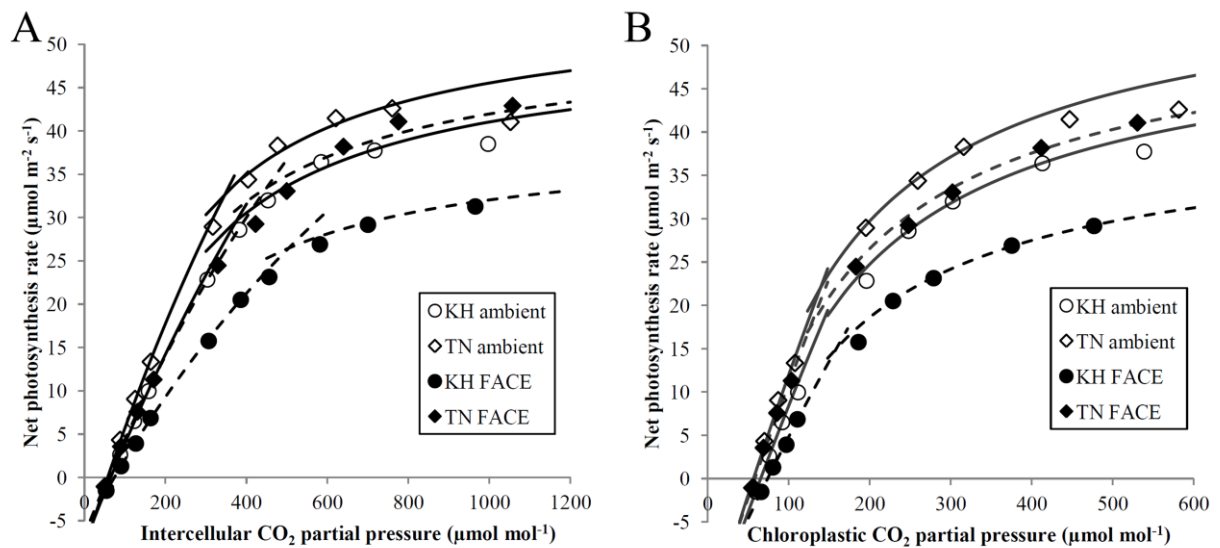

**Fig. S1.** Example CO<sub>2</sub> response curves of plants measured on flag leaves in the field during the mid-grain filling stage in 2013. Circles and diamonds indicate measurements of Koshihikari and Takanari, respectively. Open and closed symbols indicate plants grown in ambient and FACE conditions, respectively. (a)  $A-C_i$  curves fitted using to data points directly measured in the field by a commercial infra-red gas analyzer, using the “conventional method” described by Long and Bernacchi (2003). (b)  $A-C_c$  curves calculated from the  $A-C_i$  curves in (a) incorporating estimates of mesophyll conductance by employing a curve-fitting utility that simultaneously solves for mesophyll conductance alongside  $V_{c,max}$  and  $J_{max}$  (Sharkey et al. 2007).
