# Supplementary material for: Do the Rich Always Become Richer? Characterizing the Leaf Physiological Response of the High-Yielding Rice Cultivar Takanari to Free-Air CO2 Enrichment
Source: PubMed Central journal article supplement (PMC3913450; doi:10.1093/pcp/pcu009), 2014-01-30
Supplement: supp_pcu009_pcp-2013-e-00573-File008.pdf [file supp_pcu009_pcp-2013-e-00573-File008.pdf]

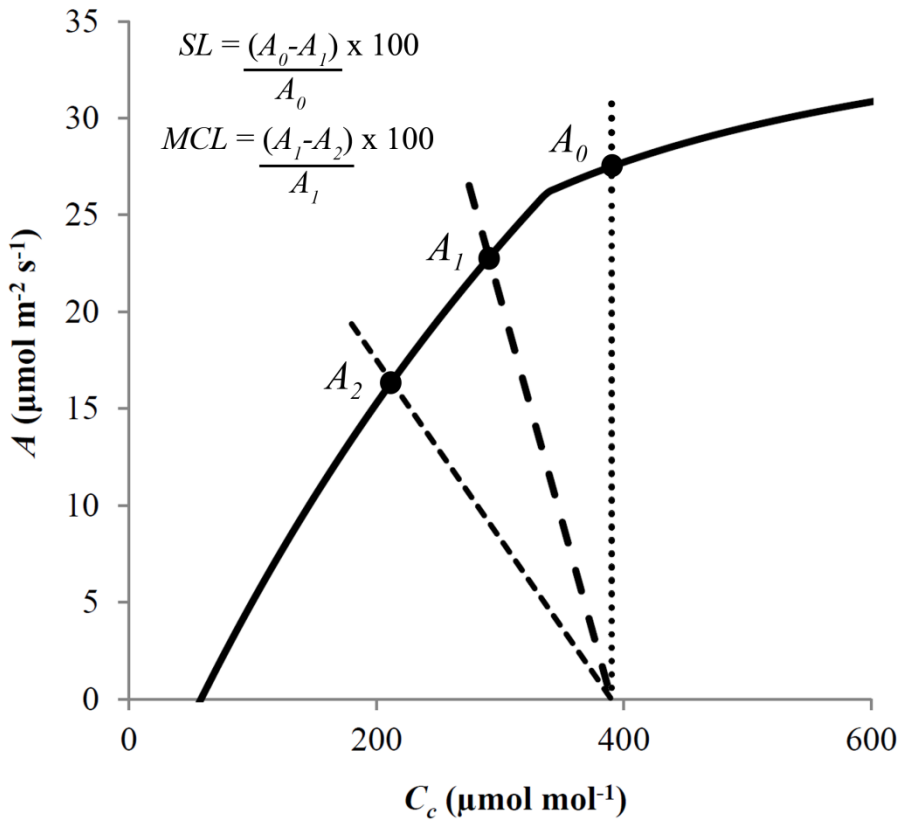

**Fig. S2.** Graphical representation of the estimation of the limitation to photosynthesis by the stomata (*SL*) and limitation by mesophyll conductance (*MCL*). An idealized CO<sub>2</sub> response curve (*A-C<sub>c</sub>*) is shown as a solid line, where *A* is the net carbon assimilation rate and *C<sub>c</sub>* is the molar fraction of carbon dioxide at the site of carboxylation. *A<sub>0</sub>* represents the theoretical rate of photosynthesis when we assume that the boundary layer conductance, stomatal conductance (*g<sub>s</sub>*), and mesophyll conductance (*g<sub>m</sub>*) are infinite, i.e., if *C<sub>c</sub>* = *C<sub>a</sub>* (atmospheric mole fraction of CO<sub>2</sub>, in this case 390 μmol mol<sup>-1</sup>). *A<sub>1</sub>* represents the theoretical rate of photosynthesis when only *g<sub>m</sub>* is assumed to be infinite, i.e., if *C<sub>c</sub>* = *C<sub>i</sub>* (intercellular mole fraction of CO<sub>2</sub>). *A<sub>2</sub>* represents the actual observed photosynthesis rate when the measured or estimated *g<sub>s</sub>* and *g<sub>m</sub>* are taken into account. The dotted line represents the CO<sub>2</sub> supply curve when there is no resistance to diffusion of CO<sub>2</sub> from the outside of the leaf to the site of carboxylation; the thick-dashed line represents the CO<sub>2</sub> supply curve in the presence of a finite boundary layer and *g<sub>s</sub>*, and the thin-dashed line is the supply curve when *g<sub>m</sub>* is also finite.
