# Supplementary material for: Do the Rich Always Become Richer? Characterizing the Leaf Physiological Response of the High-Yielding Rice Cultivar Takanari to Free-Air CO2 Enrichment
Source: PubMed Central journal article supplement (PMC3913450; doi:10.1093/pcp/pcu009), 2014-01-30
Supplement: supp_pcu009_pcp-2013-e-00573-File009.pdf [file supp_pcu009_pcp-2013-e-00573-File009.pdf]

**Table S1.** Parameter estimates of  $V_{c,max}$  and  $J_{max}$  using the “conventional” method of curve-fitting  $A-C_i$  data (i.e., assuming  $g_m$  is infinite and  $C_i = C_c$ ), as described by Long and Bernacchi (2003). Values are corrected from leaf temperature at measurement to 32°C using the temperature response functions of Bernacchi et al. (2001) and Bernacchi et al. (2003). N=4 for each timepoint.

| Year | Stage   | CO <sub>2</sub> | Cultivar    | $V_{c,max}$ at 32°C |       | $J_{max}$ at 32°C |       |
|------|---------|-----------------|-------------|---------------------|-------|-------------------|-------|
|      |         |                 |             | Mean                | SE    | Mean              | SE    |
| 2012 | Mid GF  | Ambient         | Koshihikari | 174.70              | 4.57  | 262.36            | 6.79  |
|      |         |                 | Takanari    | 213.86              | 13.40 | 283.76            | 12.36 |
|      |         | FACE            | Koshihikari | 161.79              | 7.09  | 239.03            | 14.85 |
|      |         |                 | Takanari    | 203.92              | 5.93  | 283.91            | 12.32 |
|      | Late GF | Ambient         | Koshihikari | 130.18              | 6.59  | 206.77            | 7.86  |
|      |         |                 | Takanari    | 149.60              | 5.94  | 217.52            | 9.26  |
|      |         | FACE            | Koshihikari | 104.60              | 3.07  | 177.51            | 6.59  |
|      |         |                 | Takanari    | 124.66              | 5.88  | 192.24            | 4.18  |
| 2013 | Full HD | Ambient         | Koshihikari | 168.34              | 10.16 | 280.90            | 11.74 |
|      |         |                 | Takanari    | 206.32              | 3.66  | 328.86            | 12.03 |
|      |         | FACE            | Koshihikari | 155.93              | 3.97  | 244.75            | 4.85  |
|      |         |                 | Takanari    | 190.44              | 5.64  | 320.75            | 9.40  |
|      | Mid GF  | Ambient         | Koshihikari | 148.87              | 7.49  | 230.15            | 4.32  |
|      |         |                 | Takanari    | 183.89              | 6.93  | 317.42            | 24.18 |
|      |         | FACE            | Koshihikari | 123.31              | 3.94  | 208.87            | 4.65  |
|      |         |                 | Takanari    | 164.83              | 11.34 | 286.48            | 30.14 |
